# Supplementary material for: Trace gas and particle emissions from open biomass burning in Mexico
Source: Copernicus journal article supplement (doi:10.5194/acp-11-6787-2011), 2011-07-18
Supplement: Supplementary file 1 [file acp-11-6787-2011-supplement.pdf]

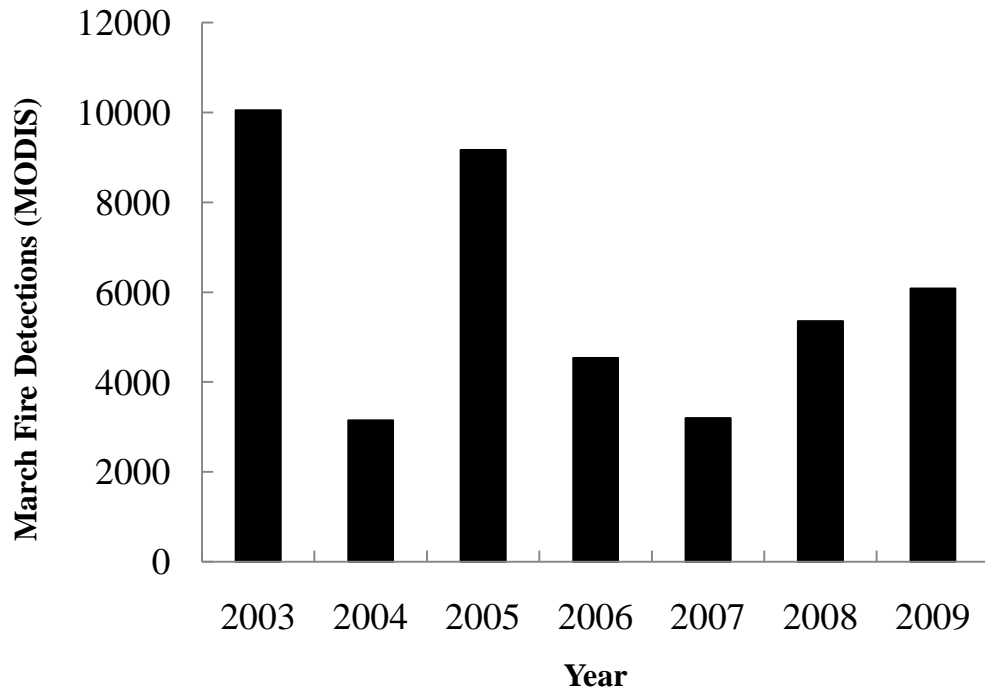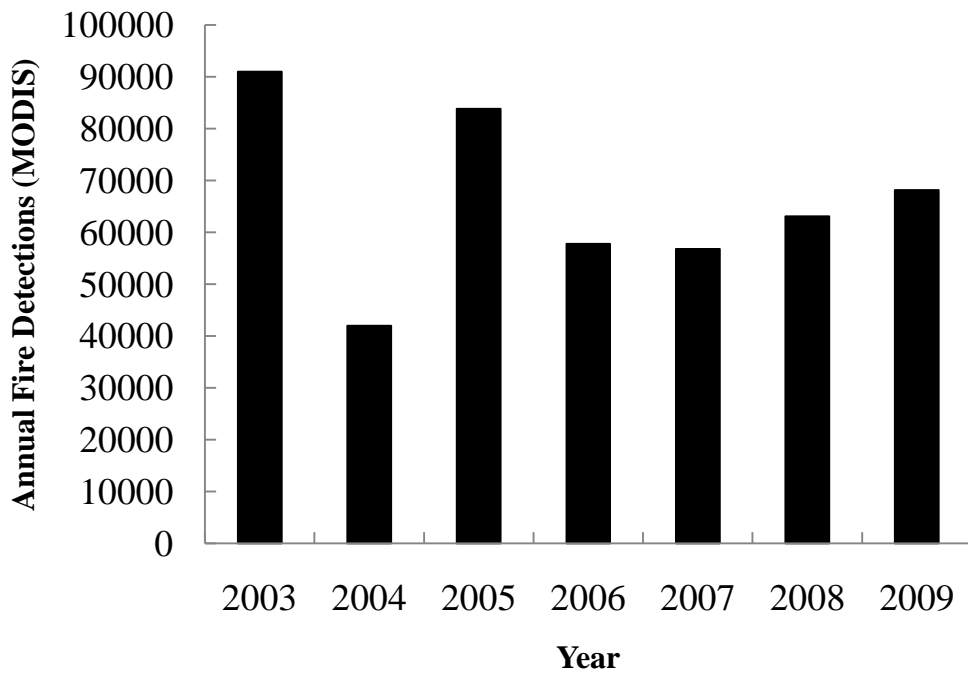

**Supplementary Figure 1.** For each year from 2003-2009, we show the number of MODIS active fire detections in Mexico during March (upper chart) and the annual totals (lower chart). The number of fire detections in March 2006 is 76% of the 2003-2009 March average (5931). The number of fire detections in all of 2006 is 87% of the 2003-2009 annual average (66066).
